# Supplementary material for: Relationship Between the Oral Hygiene and Hand Hygiene Practices of Korean Adolescents: A Study Focused on the 15th Korea Youth Risk Behavior Survey Conducted in 2019
Source: Research Square preprint supplement (doi:10.21203/rs.3.rs-151822/v1), 2021-01-25
Supplement: Supplementary file 1 [file c73a9bee78d24a376aad16d7.docx]

**2019 Korea Youth Risk Behavior Web-based Survey**

**[General characteristics]**

1. What is your gender?

① Male
② Female

2. What grade are you in?
① First grade in middle school

② Second grade in middle school
③ Third grade in middle school
④ First grade in high school
⑤ Second grade in high school
⑥ Third in high school

**[Tooth brushing practice]**

In the last 7 days, how often have you brushed your teeth after lunch at school?

① Always

② Mostly

③ Sometimes

④ Never

**[Hand washing practice]**

In the last 7 days, how often have you washed your hands with soap before eating at school?

① Always

② Mostly

③ Sometimes

④ Never

[Among the variables used in this study, the school type and the type of residence were investigated at the sampling stage]
